# Supplementary material for: Endohedral Hydrogen Bonding Templates the Formation of a Highly Strained Covalent Organic Cage Compound
Source: PubMed Central journal article supplement — Chemistry. 2021 Mar 3;27(19):6077–85. doi: 10.1002/chem.202005276 (PMC8048910; doi:10.1002/chem.202005276), 2021-03-03
Supplement: CHEM-27-6077-s001.pdf [file CHEM-27-6077-s001.pdf]

# Chemistry–A European Journal

Supporting Information

## **Endohedral Hydrogen Bonding Templates the Formation of a Highly Strained Covalent Organic Cage Compound\*\***

Natalie Schäfer,<sup>[a, b]</sup> Michael Bühler,<sup>[b]</sup> Lisa Heyer,<sup>[a, b]</sup> Merle I. S. Röhr,<sup>[b]</sup> and Florian Beuerle\*<sup>[a, b]</sup>

## **Content**

|          |                             |     |
|----------|-----------------------------|-----|
| <b>1</b> | <b>Synthetic Procedures</b> | S2  |
| <b>2</b> | <b>Analytical Data</b>      | S4  |
| <b>3</b> | <b>NMR Experiments</b>      | S11 |
| <b>4</b> | <b>Molecular Modeling</b>   | S17 |
| <b>5</b> | <b>References</b>           | S19 |

# 1 Synthetic Procedures

Compounds **S2**,<sup>[S1]</sup> **3**,<sup>[S2]</sup> **4**,<sup>[S1]</sup> **5**<sup>[S3]</sup> and **A**<sup>[S4]</sup> have been synthesized according to previously published procedures.

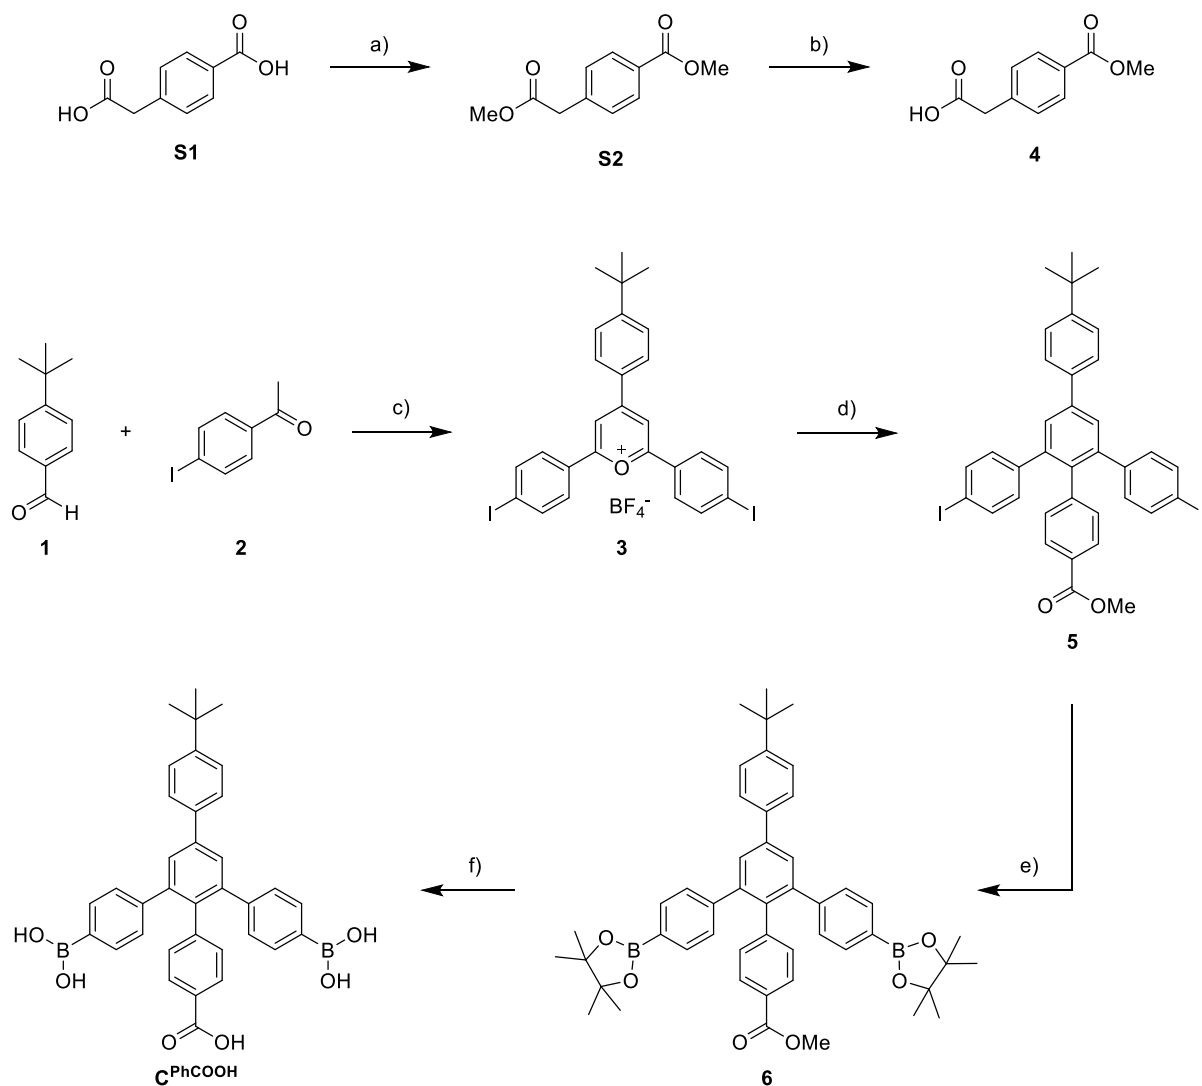

**Scheme S1.** Synthesis of diboronic acid **C<sup>PhCOOH</sup>**: a) H<sub>2</sub>SO<sub>4</sub>, MeOH, 90 °C, 19 h, 93%, b) K<sub>2</sub>CO<sub>3</sub>, MeOH/H<sub>2</sub>O, rt, 24 h, 93%, c) BF<sub>3</sub>·OEt<sub>2</sub>, 100 °C, 2 h, 38%, d) 1. **4**, NaOH, MeOH, 30 min, 2. Ac<sub>2</sub>O, 160 °C, 2 h, 55%, e) B<sub>2</sub>pin<sub>2</sub> / KOAc / Pd(dppf)Cl<sub>2</sub>, DMF, reflux, 2 h 30 min, 71%, f) BBr<sub>3</sub>, CH<sub>2</sub>Cl<sub>2</sub>, 3 h 45 min, 0 °C → rt, 76%.

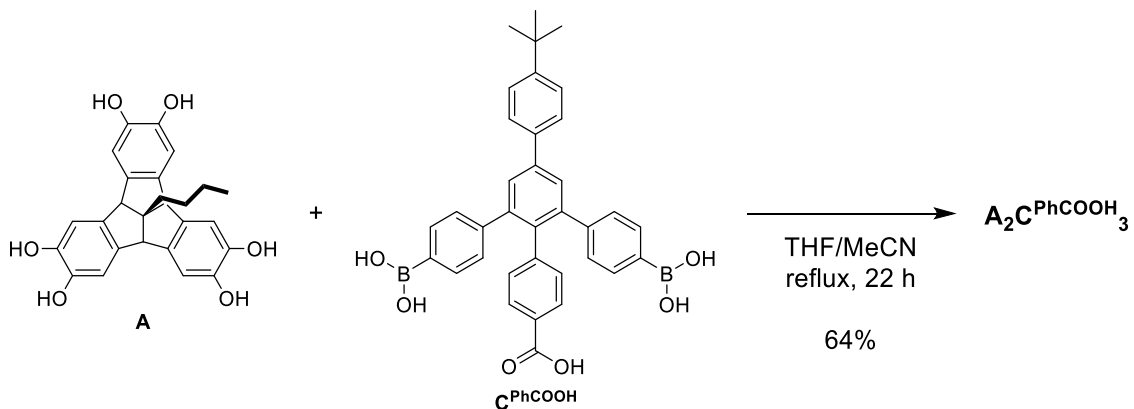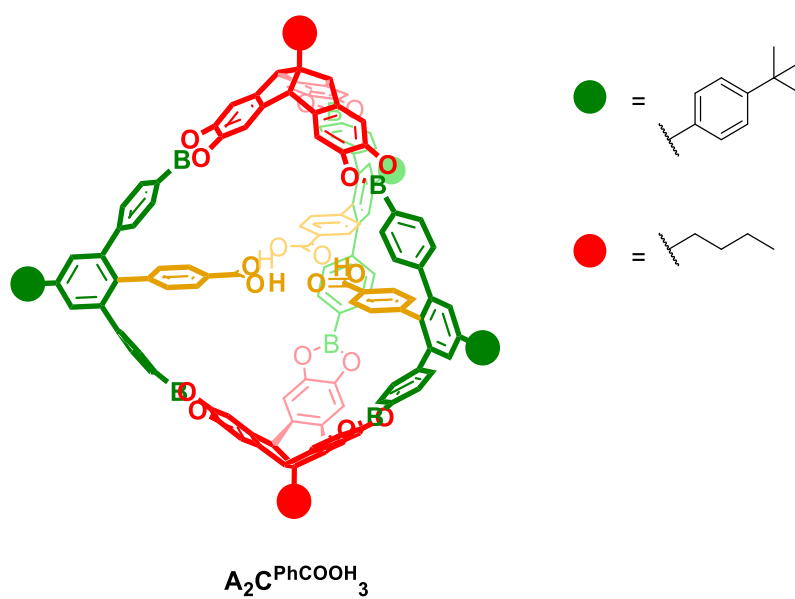

*Scheme S2.* Synthesis of cage  $\text{A}_2\text{C}^{\text{PhCOOH}}_3$ .

## 2 Analytical Data

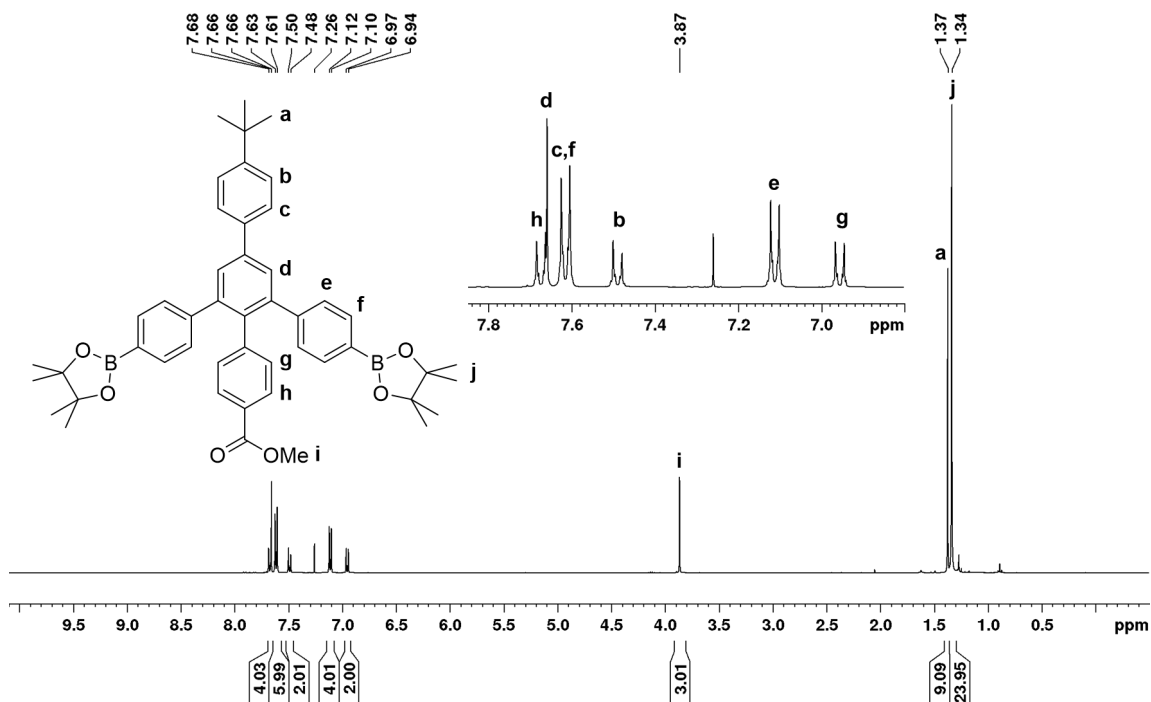

**Figure S1.**  $^1\text{H}$  NMR (400 MHz,  $\text{CDCl}_3$ , rt) spectrum of **6**.

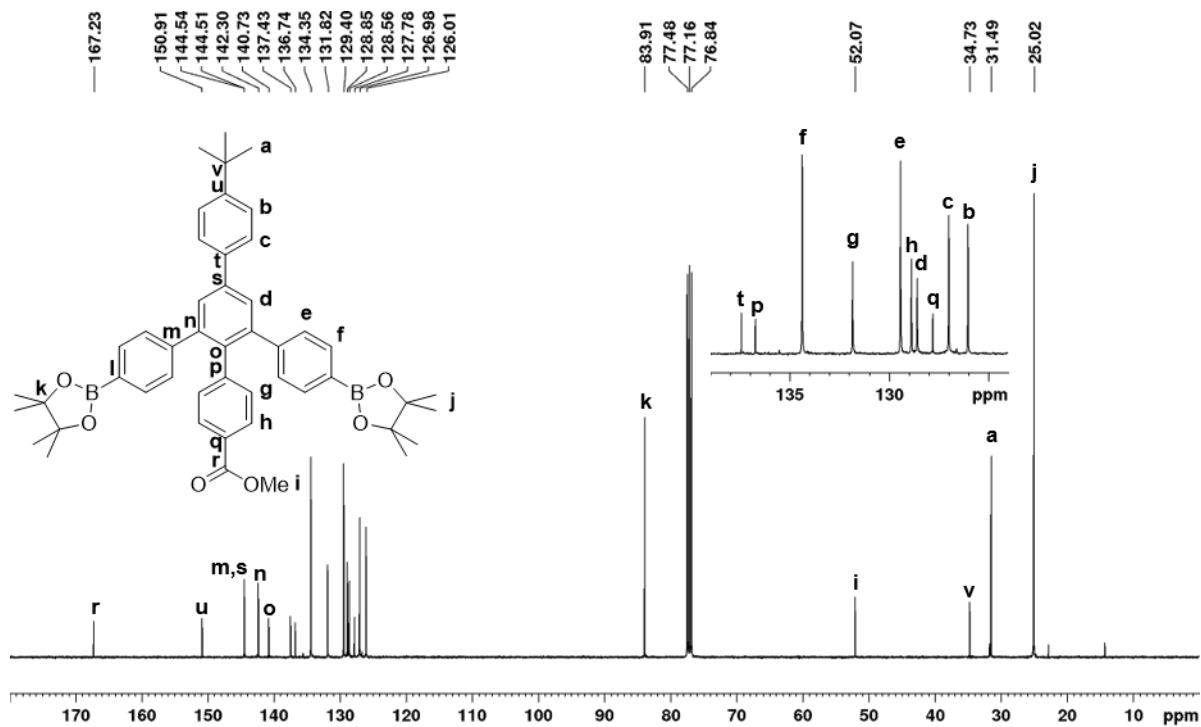

**Figure S2.**  $^{13}\text{C}$  NMR (101 MHz,  $\text{CDCl}_3$ , rt) spectrum of **6**.

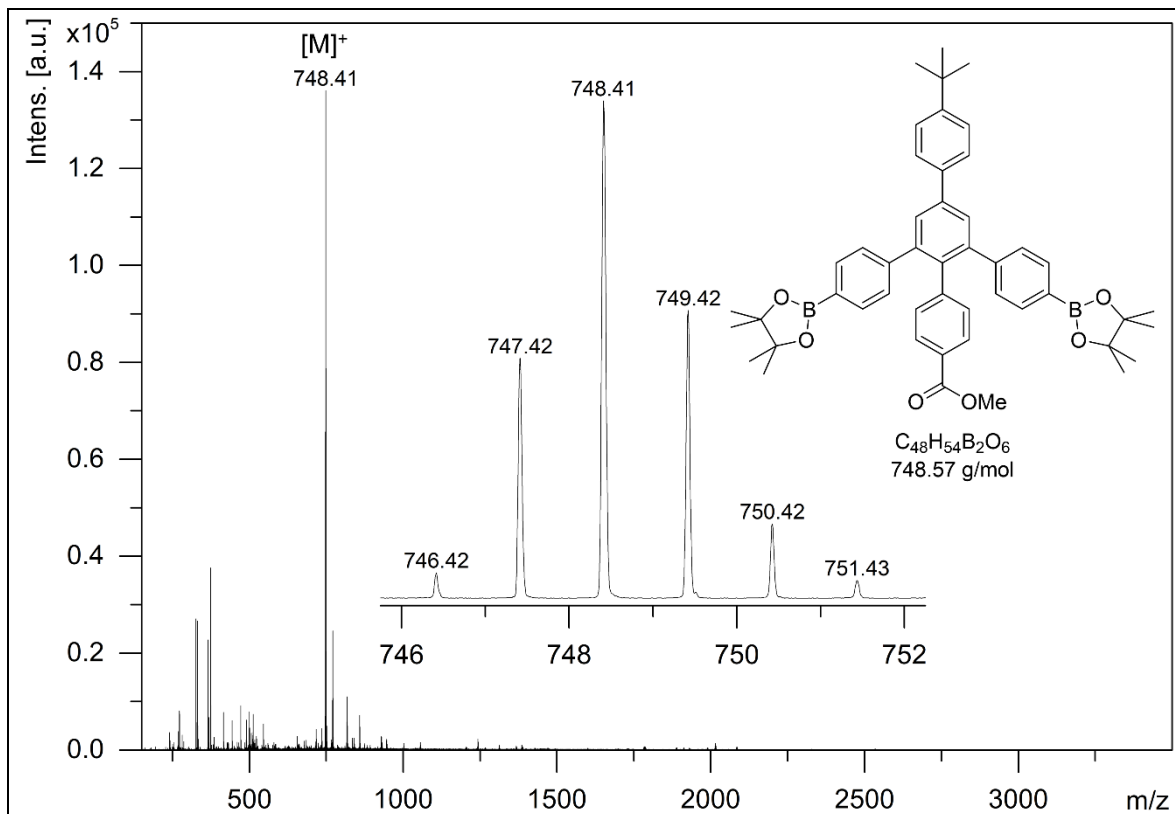

**Figure S3.** MS (MALDI-TOF, DCTB in  $CHCl_3$ , pos.) of **6**.

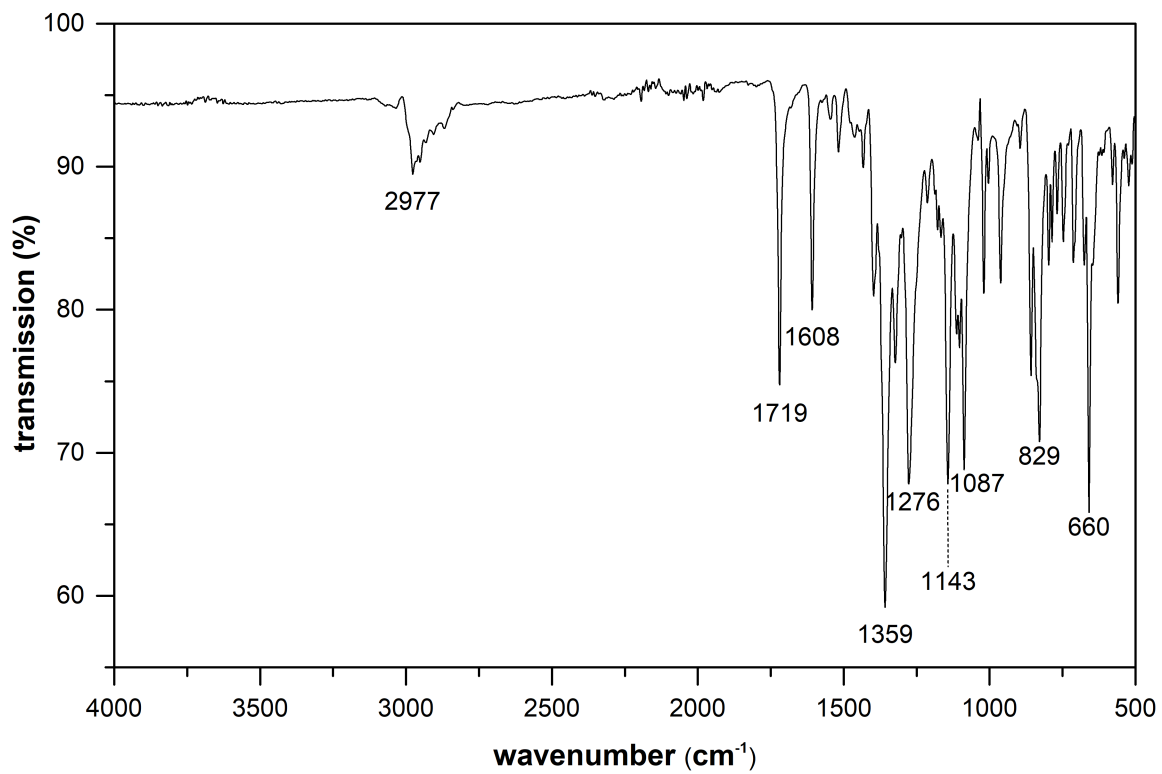

**Figure S4.** FT-IR spectrum of **6**.

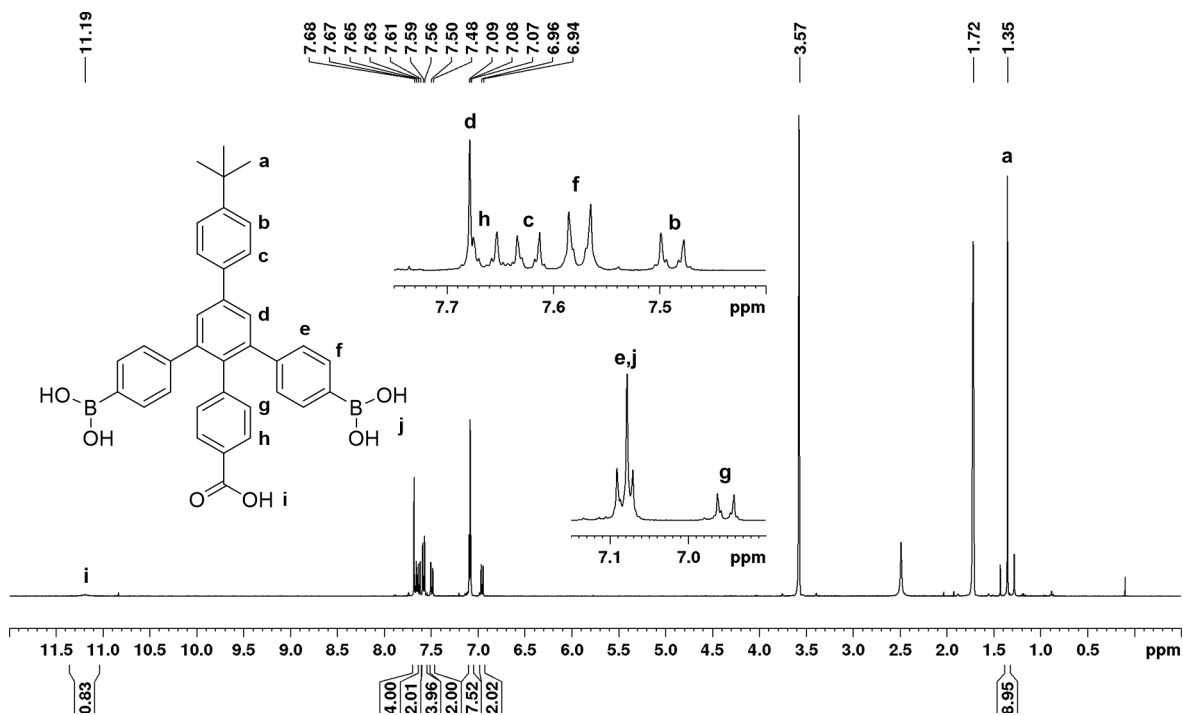

Figure S5.  $^1H$  NMR (400 MHz, THF- $d_8$ , rt) spectrum of  $C^{Ph}COOH$ .

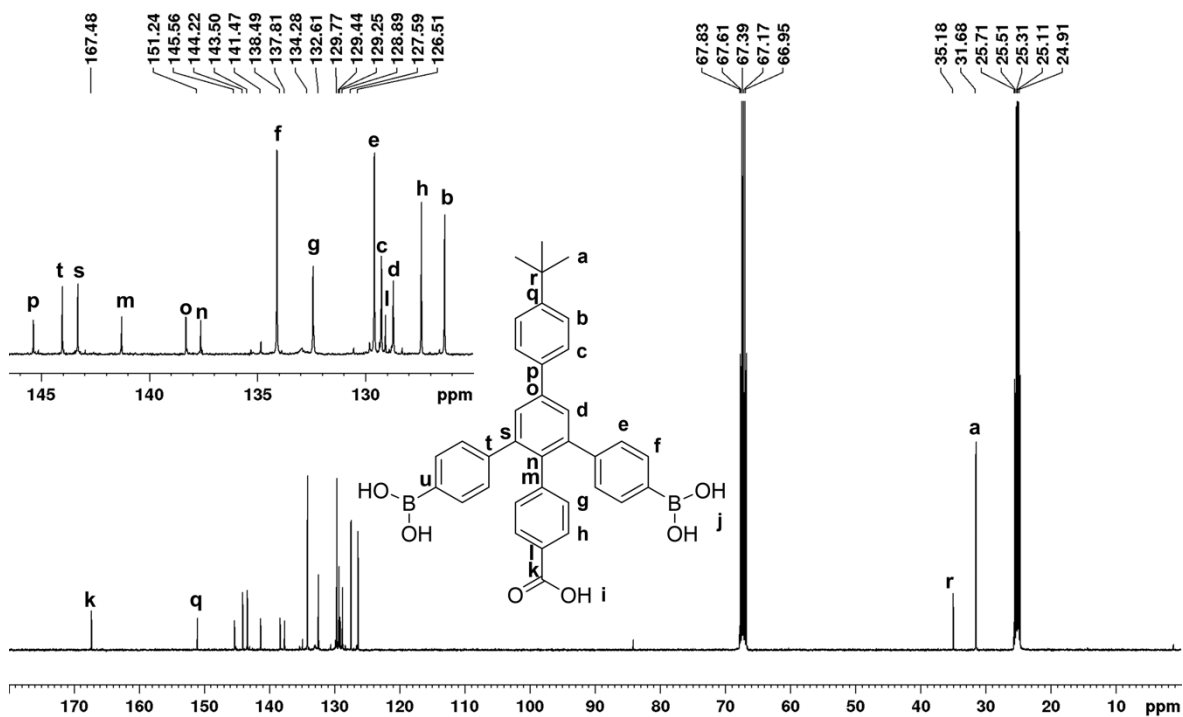

Figure S6.  $^{13}C$  NMR (101 MHz, THF- $d_8$ , rt) spectrum of  $C^{Ph}COOH$ .

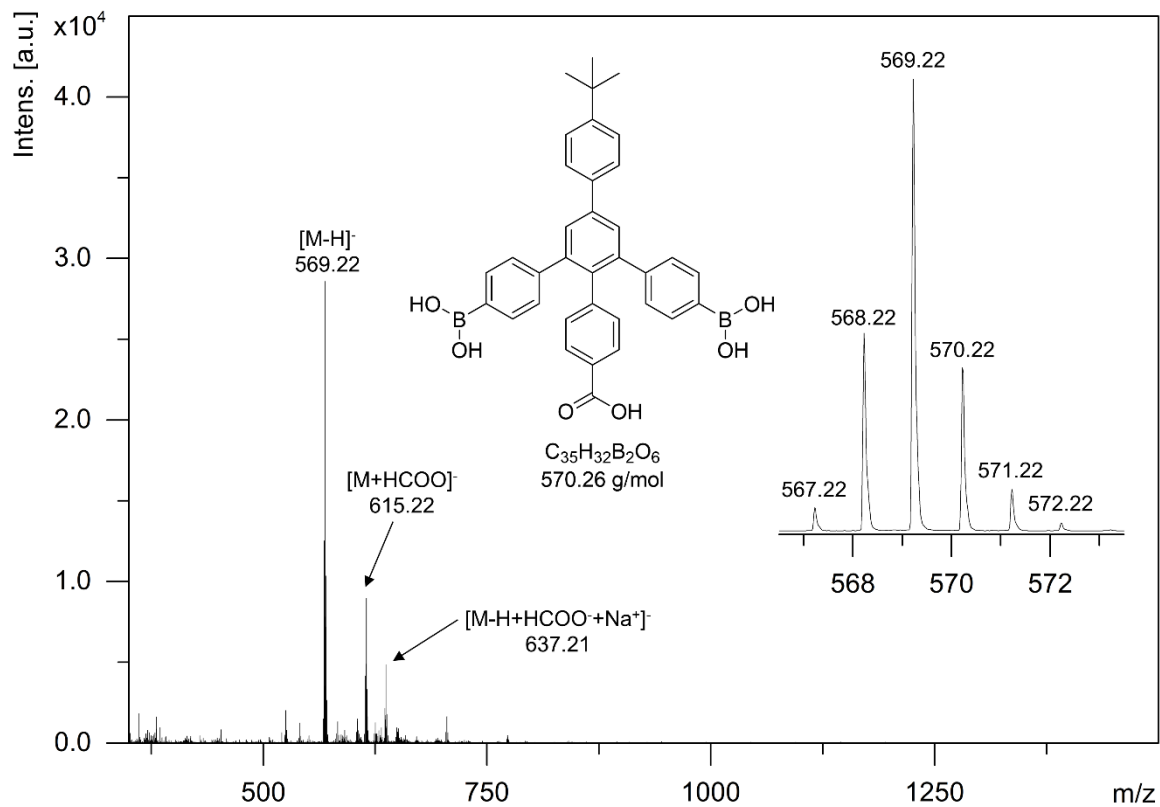

**Figure S7.** MS (ESI, EtOAc/ACN, neg.) of  $C^{Ph}COOH$ .

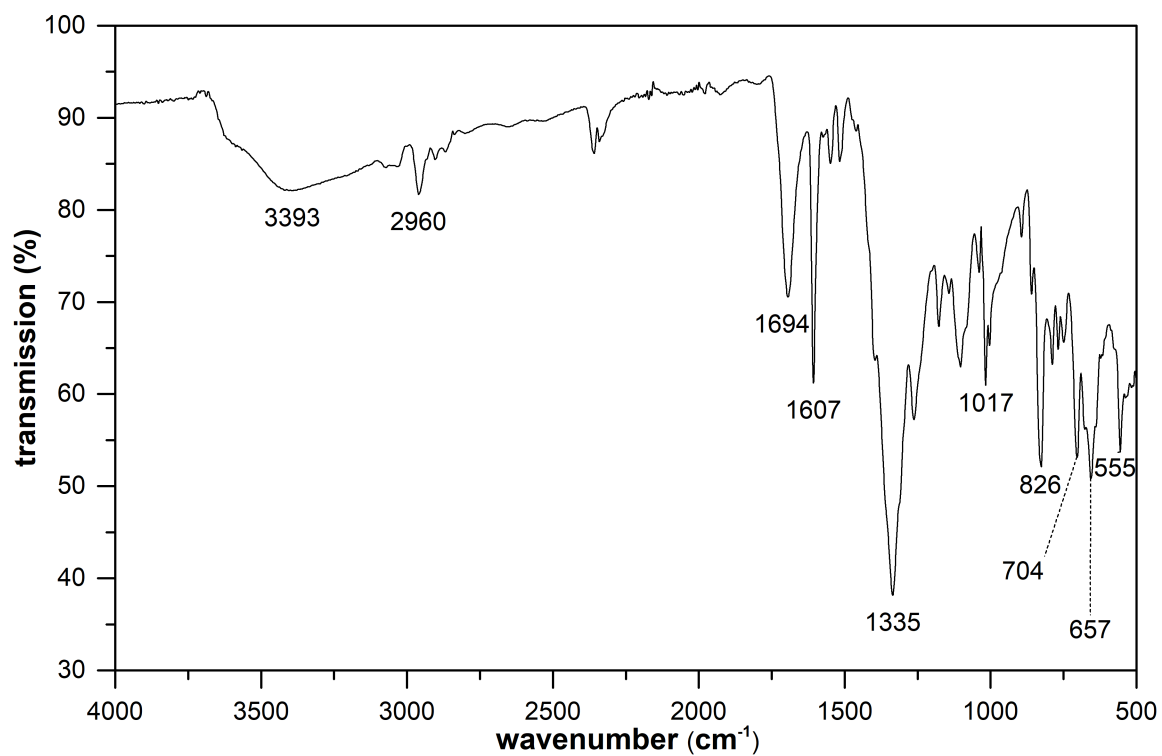

**Figure S8.** FT-IR spectrum of  $C^{Ph}COOH$ .



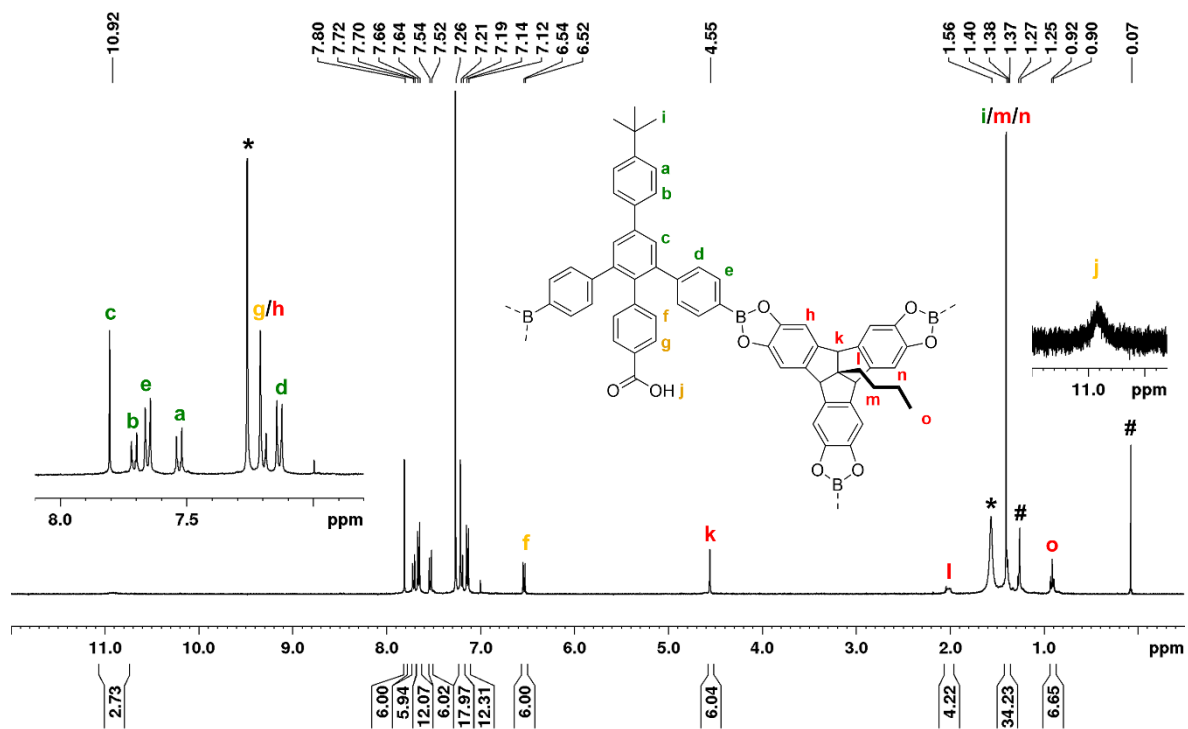

**Figure S9.**  $^1\text{H}$  NMR (400 MHz,  $\text{CDCl}_3$ , rt) spectrum of  $\text{A}_2\text{C}^{\text{PhCOOH}}_3$  (# Indicates grease.

\* Indicates residual  $\text{CHCl}_3$  and  $\text{H}_2\text{O}$ ).

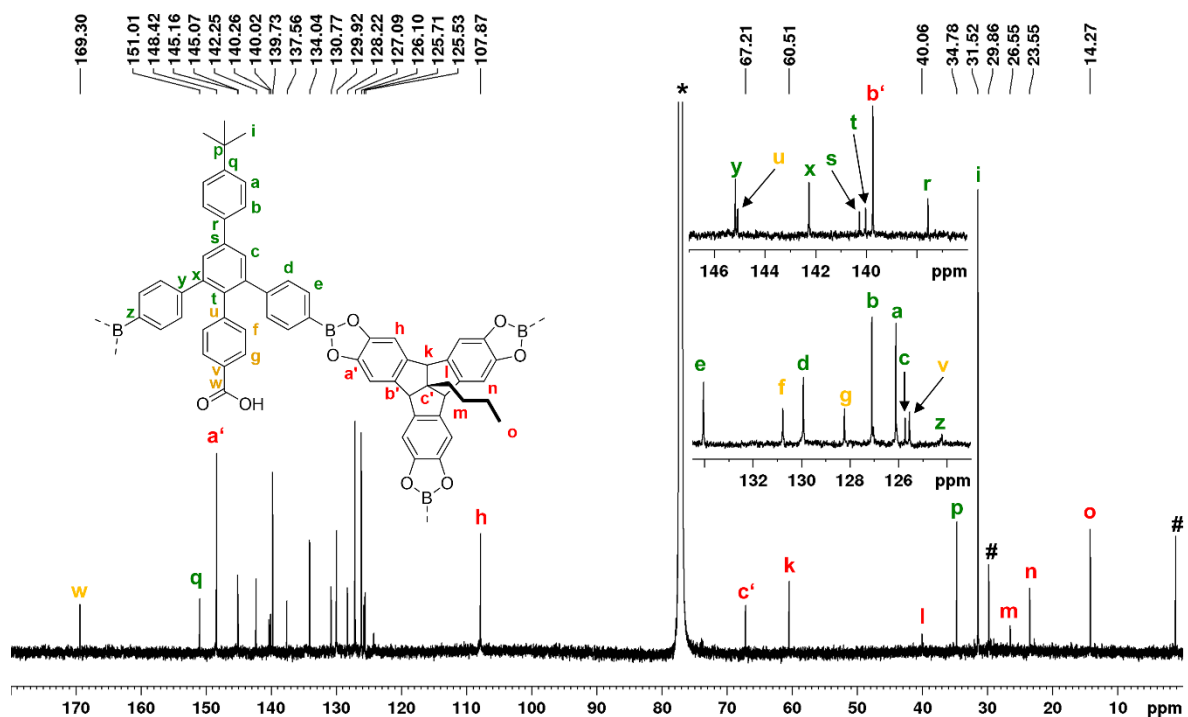

**Figure S10.**  $^{13}\text{C}$  NMR (151 MHz,  $\text{CDCl}_3$ , rt) spectrum of  $\text{A}_2\text{C}^{\text{PhCOOH}}_3$  (# Indicates grease).

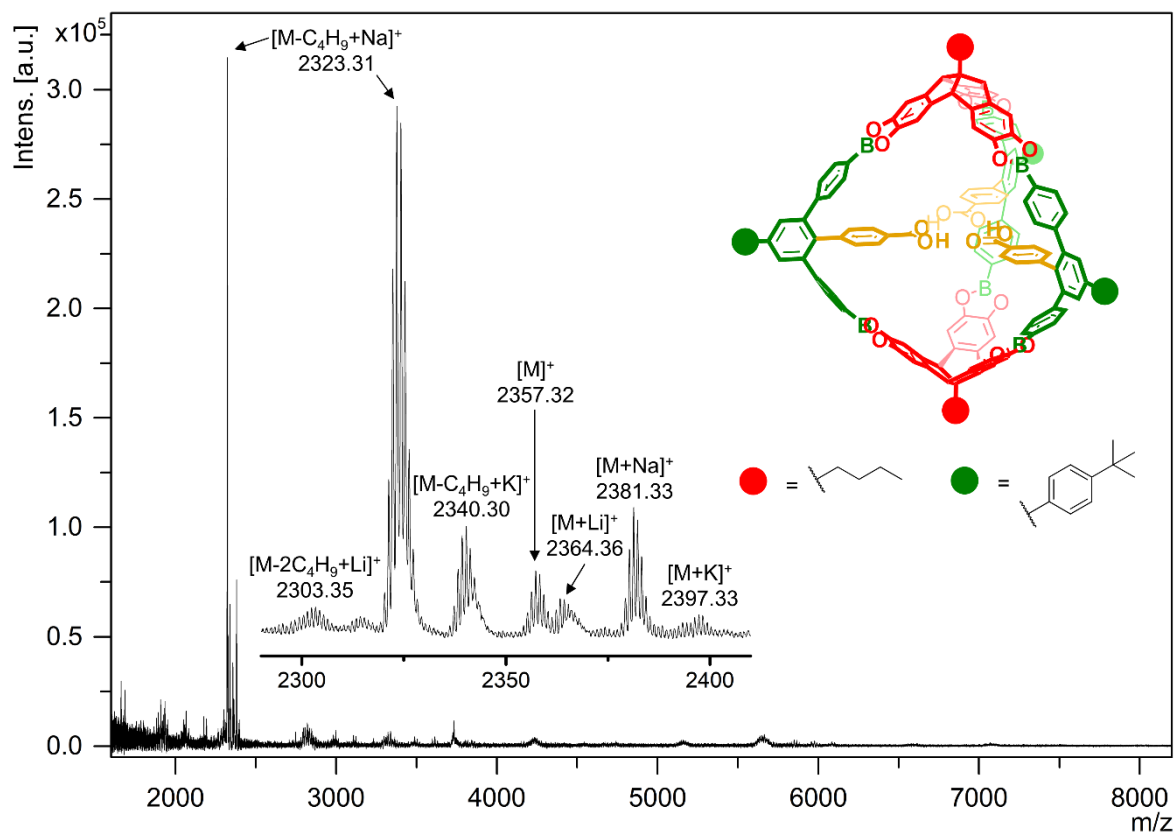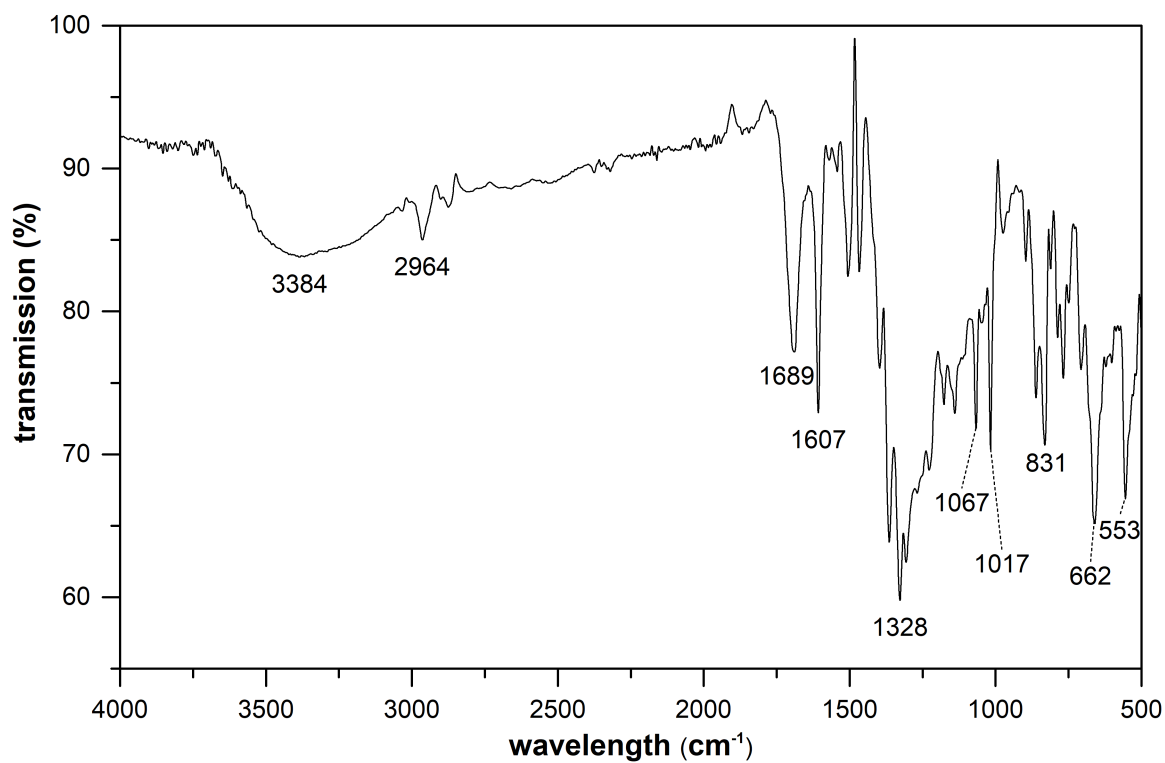

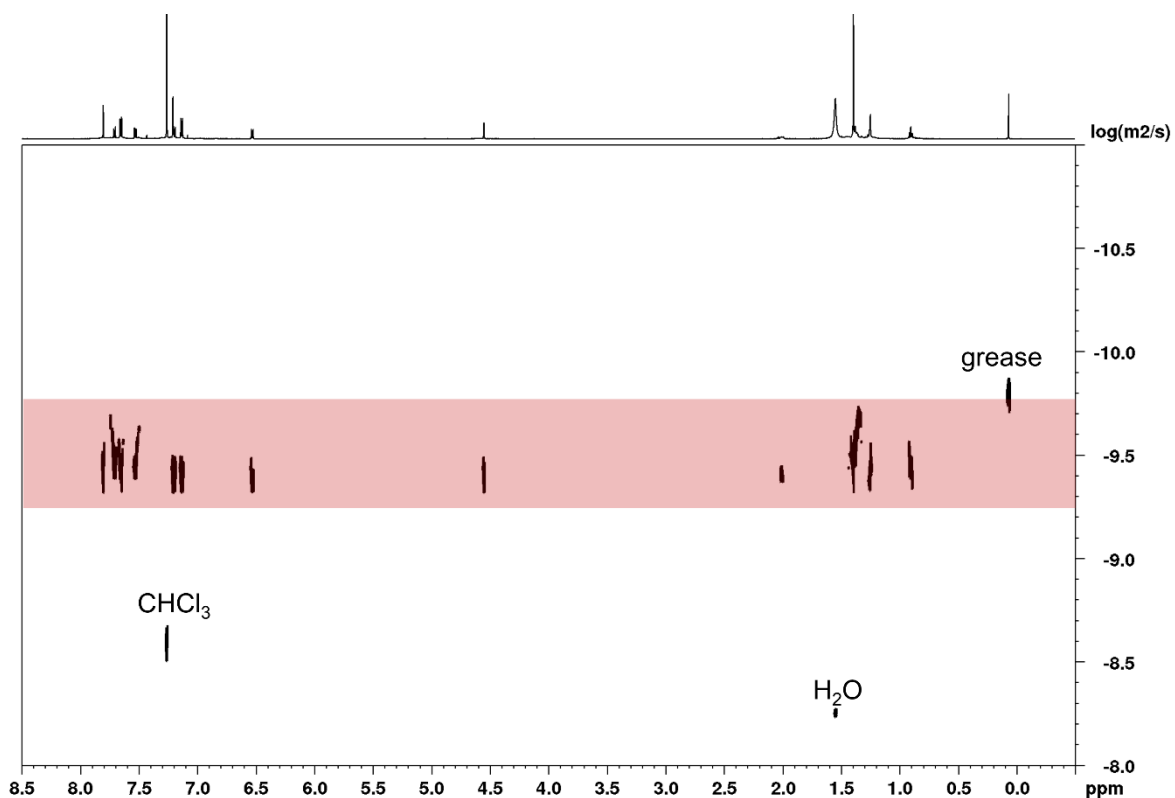

**Figure S13.** 2D plot of DOSY NMR (600 MHz, CDCl<sub>3</sub>, 295.6 K) of A<sub>2</sub>C<sup>PhCOOH</sup><sub>3</sub>.

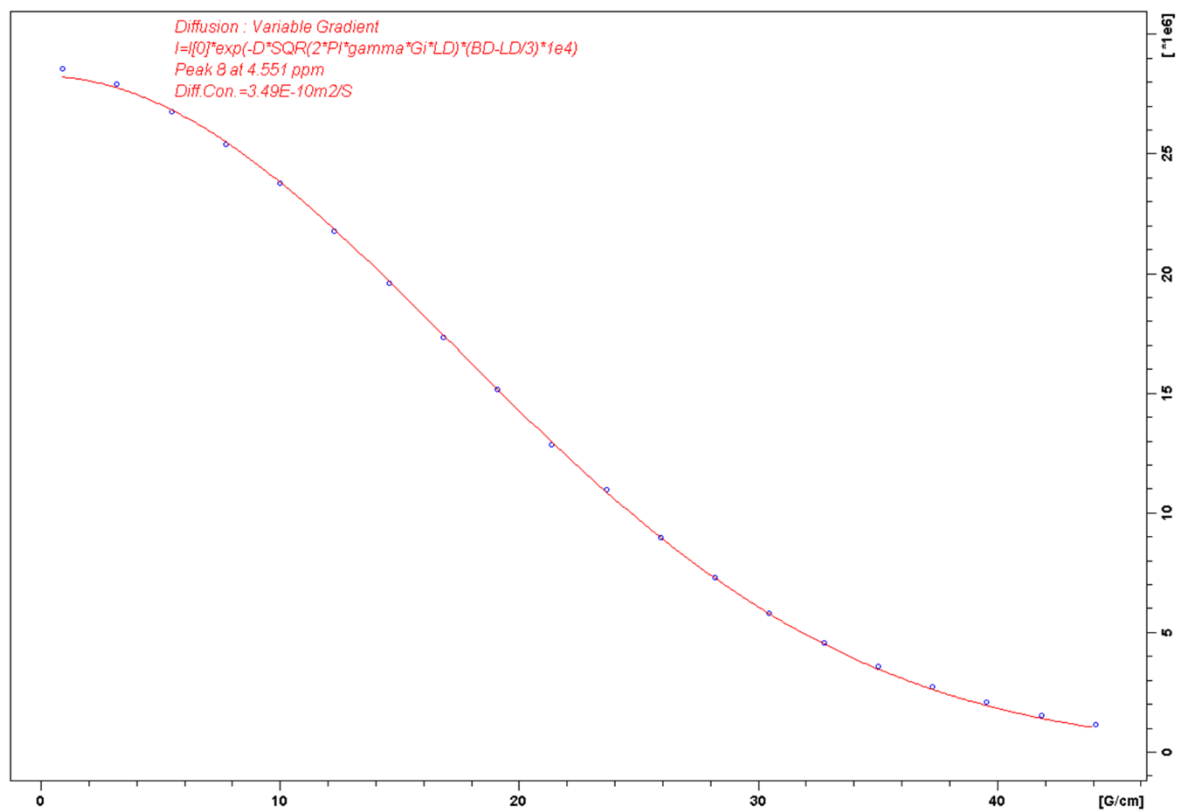

**Figure S14.** Monoexponential fit of the amplitude decay for selected proton signal at  $\delta = 4.56$  ppm of cage A<sub>2</sub>C<sup>PhCOOH</sup><sub>3</sub>.

### 3 NMR Experiments

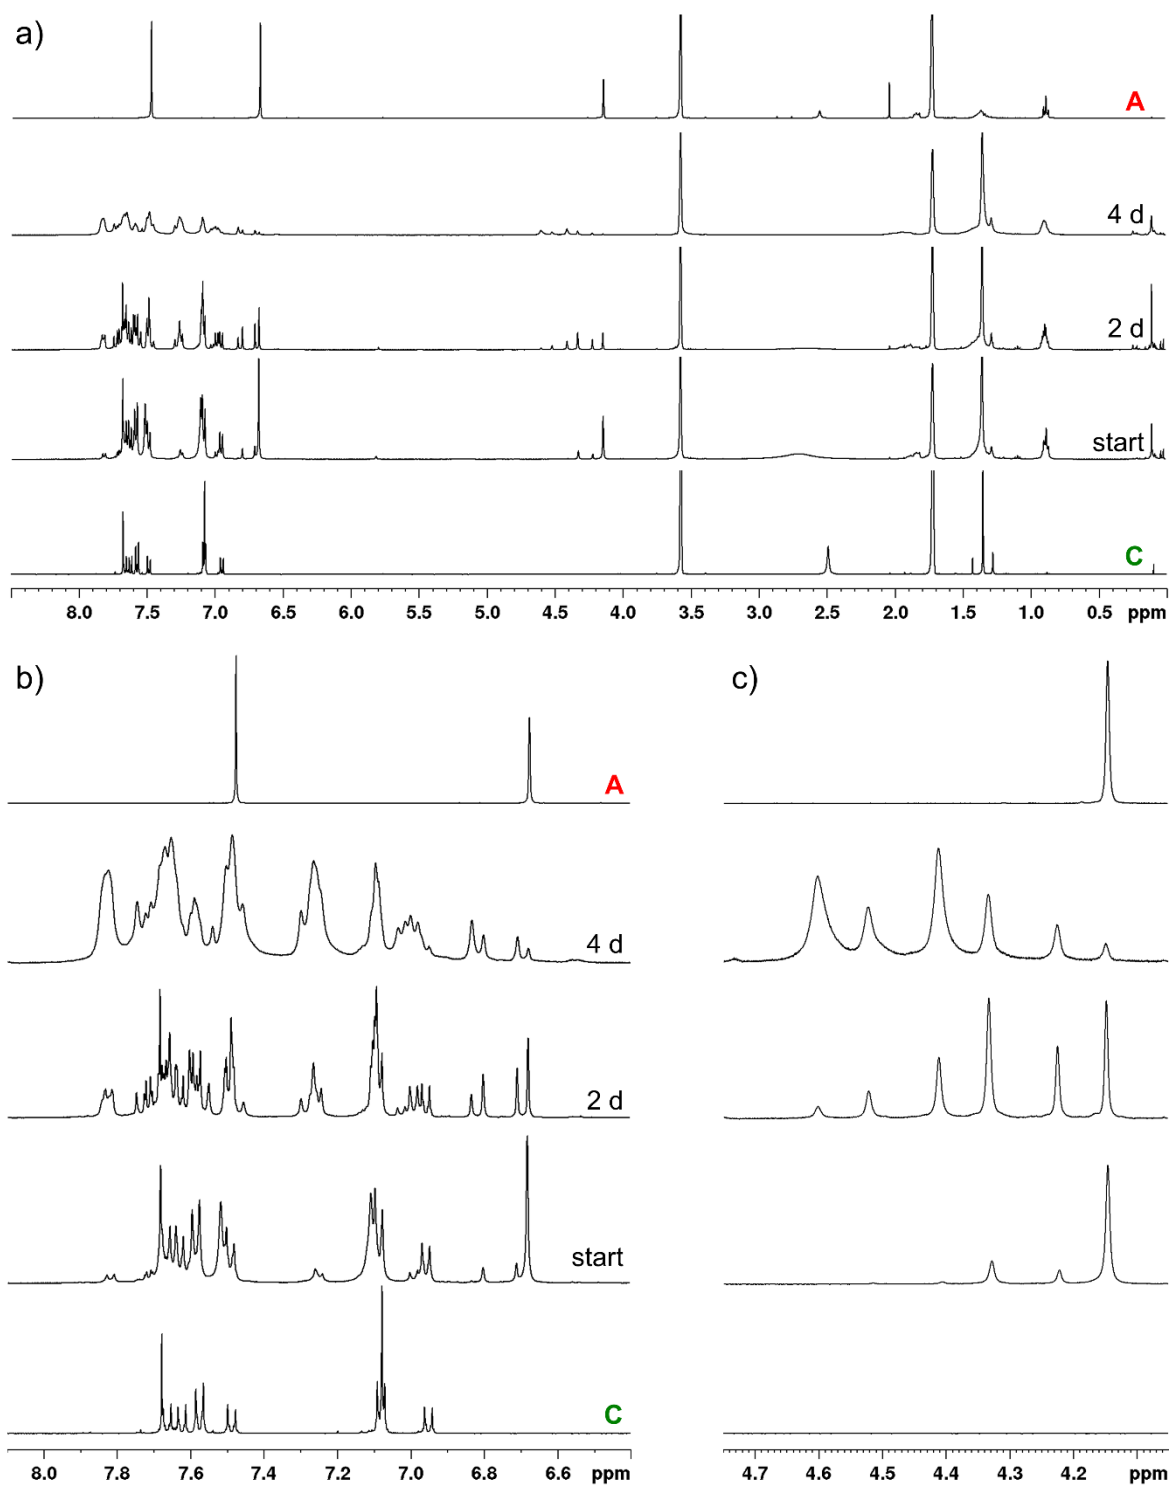

**Figure S15.**  $^1\text{H}$  NMR (400 MHz,  $\text{THF-}d_8$ , rt) spectra of **A**,  $\text{C}^{\text{PhCOOH}}$  and the reaction mixture directly, two days and four days after mixing both components ( $\text{A}:\text{C}^{\text{PhCOOH}} = 2:3$ ,  $c(\text{A}) = 2.5 \times 10^{-2} \text{ mol L}^{-1}$ ) in  $\text{THF-}d_8$ : a) overview; b) details of the aromatic region; c) details of the bridgehead area.

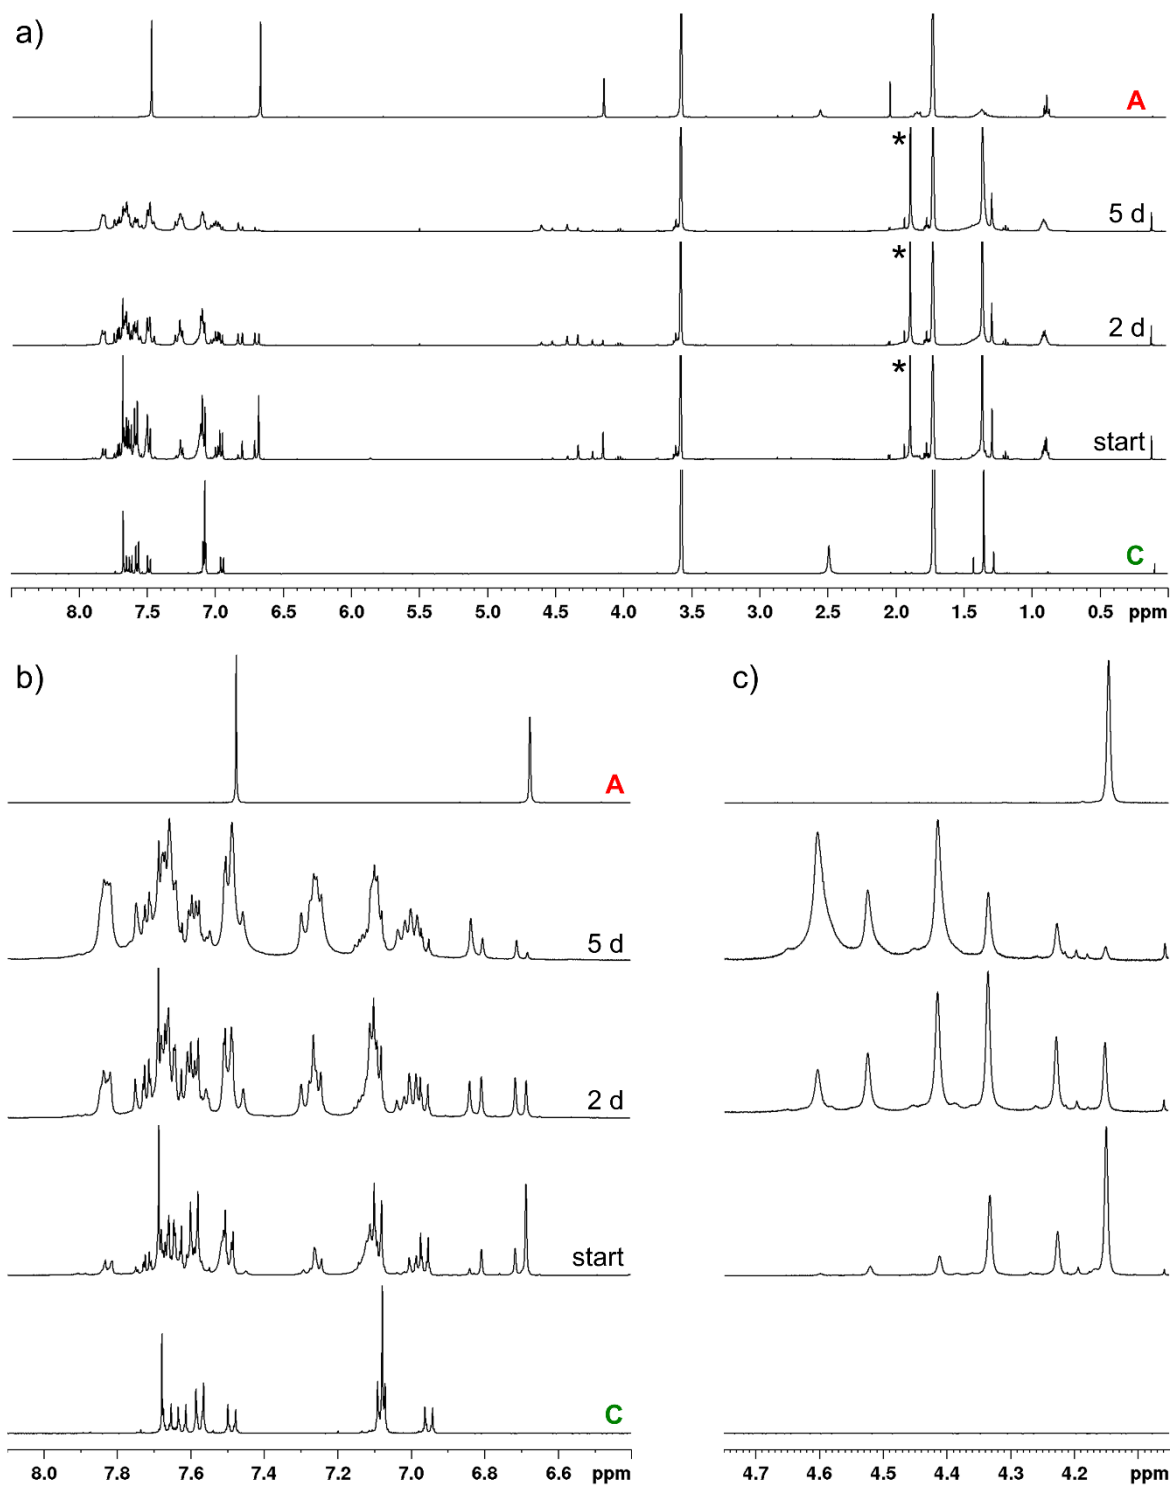

**Figure S16.**  $^1\text{H}$  NMR (400 MHz,  $\text{THF-}d_8$ , rt) spectra of **A**,  $\text{C}^{\text{PhCOOH}}$  and the reaction mixture directly, two days and five days after mixing both components in the presence of AcOH (**A**: $\text{C}^{\text{PhCOOH}}$ :AcOH = 2:3:6,  $c(\text{A}) = 2.5 \times 10^{-2} \text{ mol L}^{-1}$ ) in  $\text{THF-}d_8$ : a) overview (\* denotes AcOH); b) details of the aromatic region; c) details of the bridgehead area.

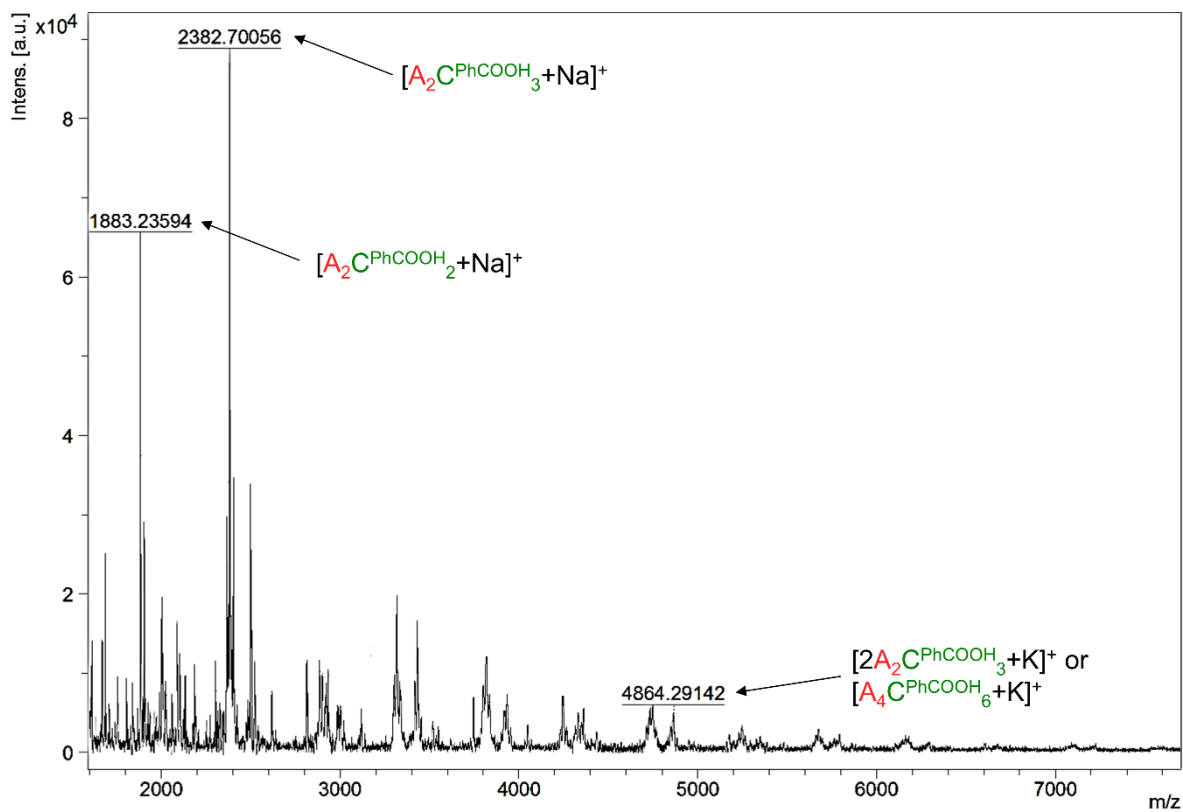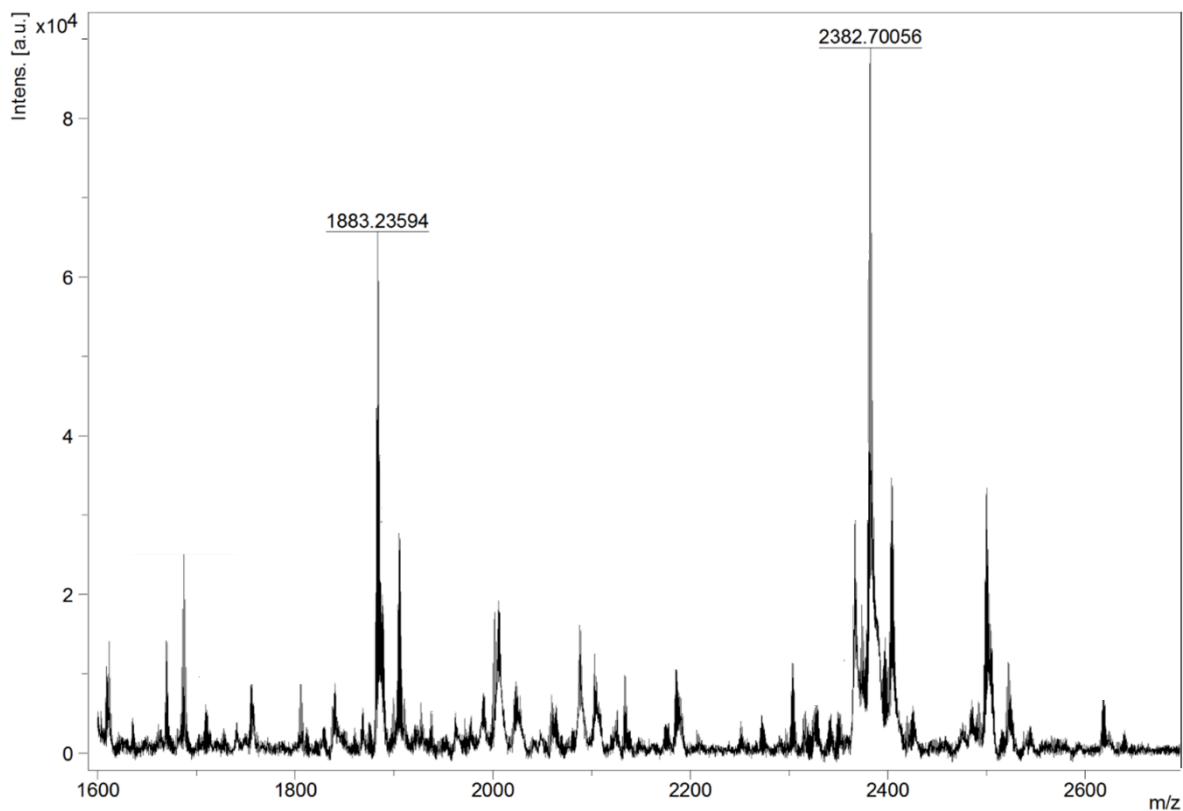

**Figure S17.** MS (MALDI-TOF, DCTB in  $CHCl_3$ , pos.) of the reaction mixture from  $A/C^{PhCOOH} = 2:3$  in  $THF-d_8$  after five days ( $c(A) = 2.5 \times 10^{-2} \text{ mol L}^{-1}$ ).

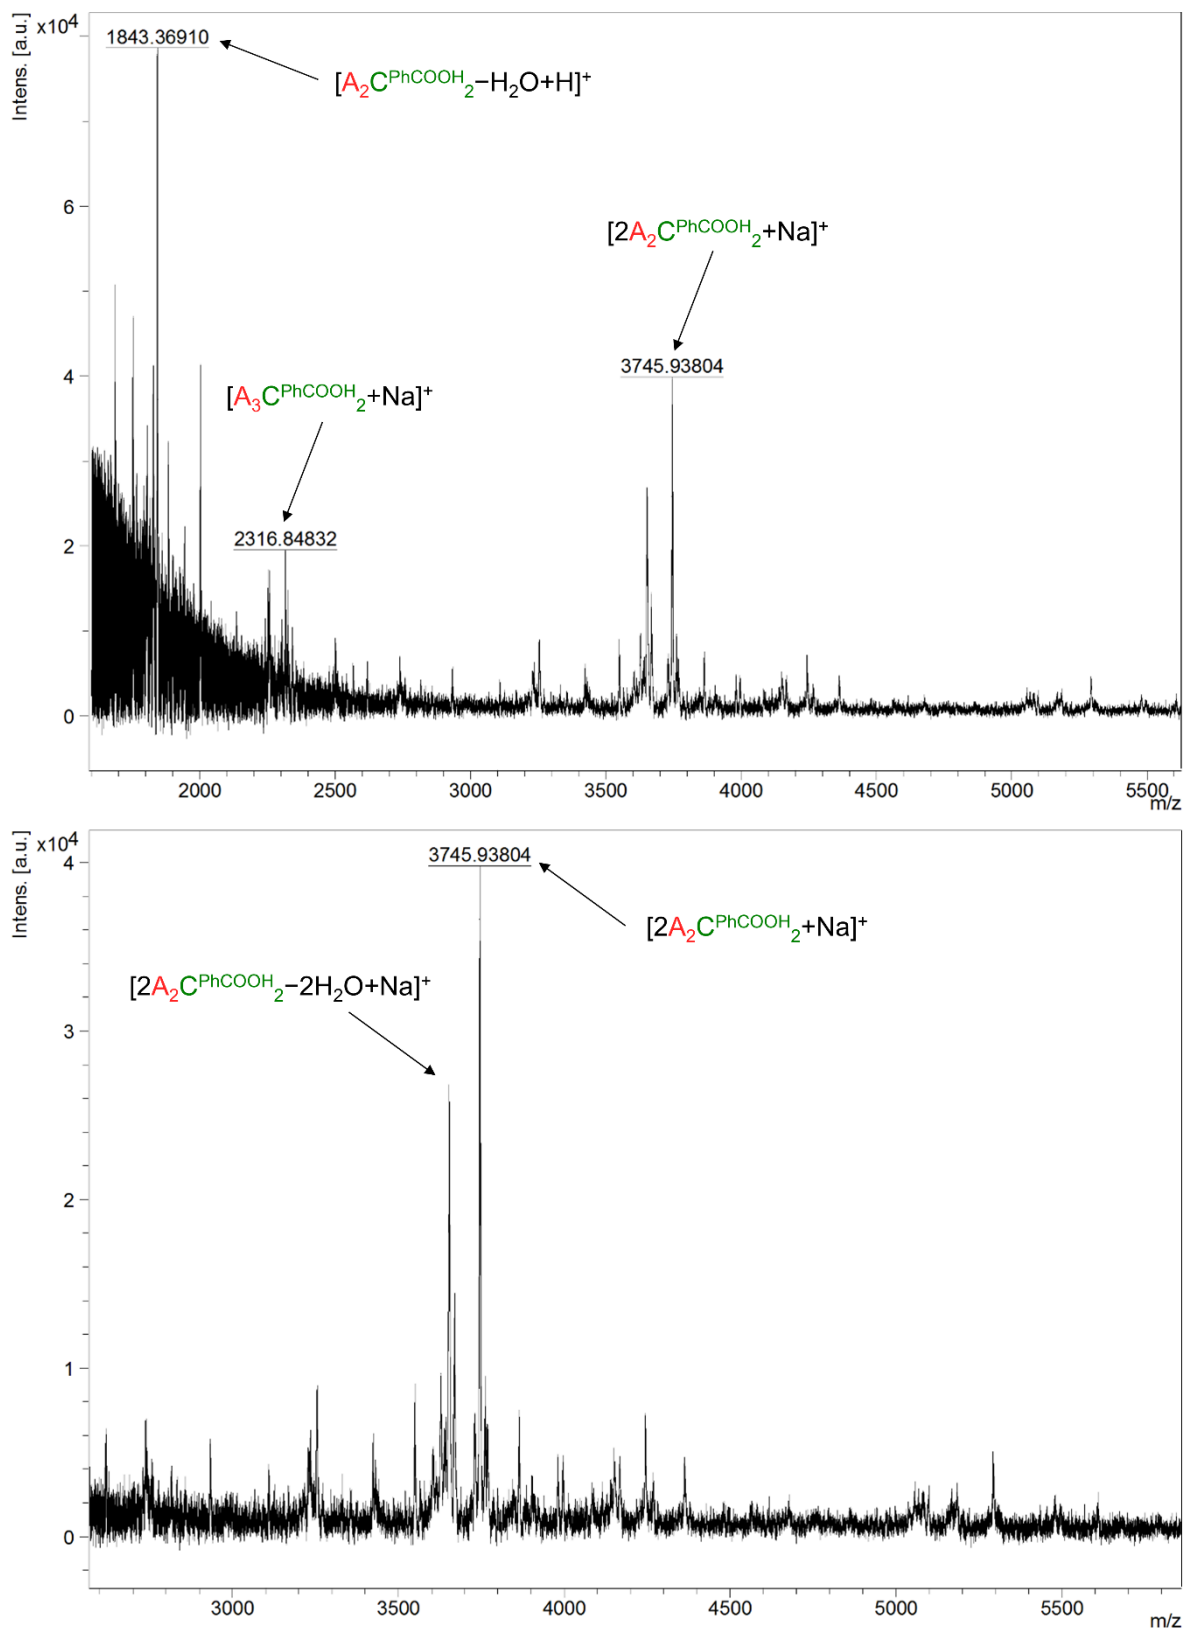

**Figure S18.** MS (MALDI-TOF, DCTB in CHCl<sub>3</sub>, pos.) of the reaction mixture from  $A/C^{PhCOOH} = 2:2$  in THF-*d*<sub>8</sub> after five days ( $c(A) = 2.5 \times 10^{-2}$  mol L<sup>-1</sup>).

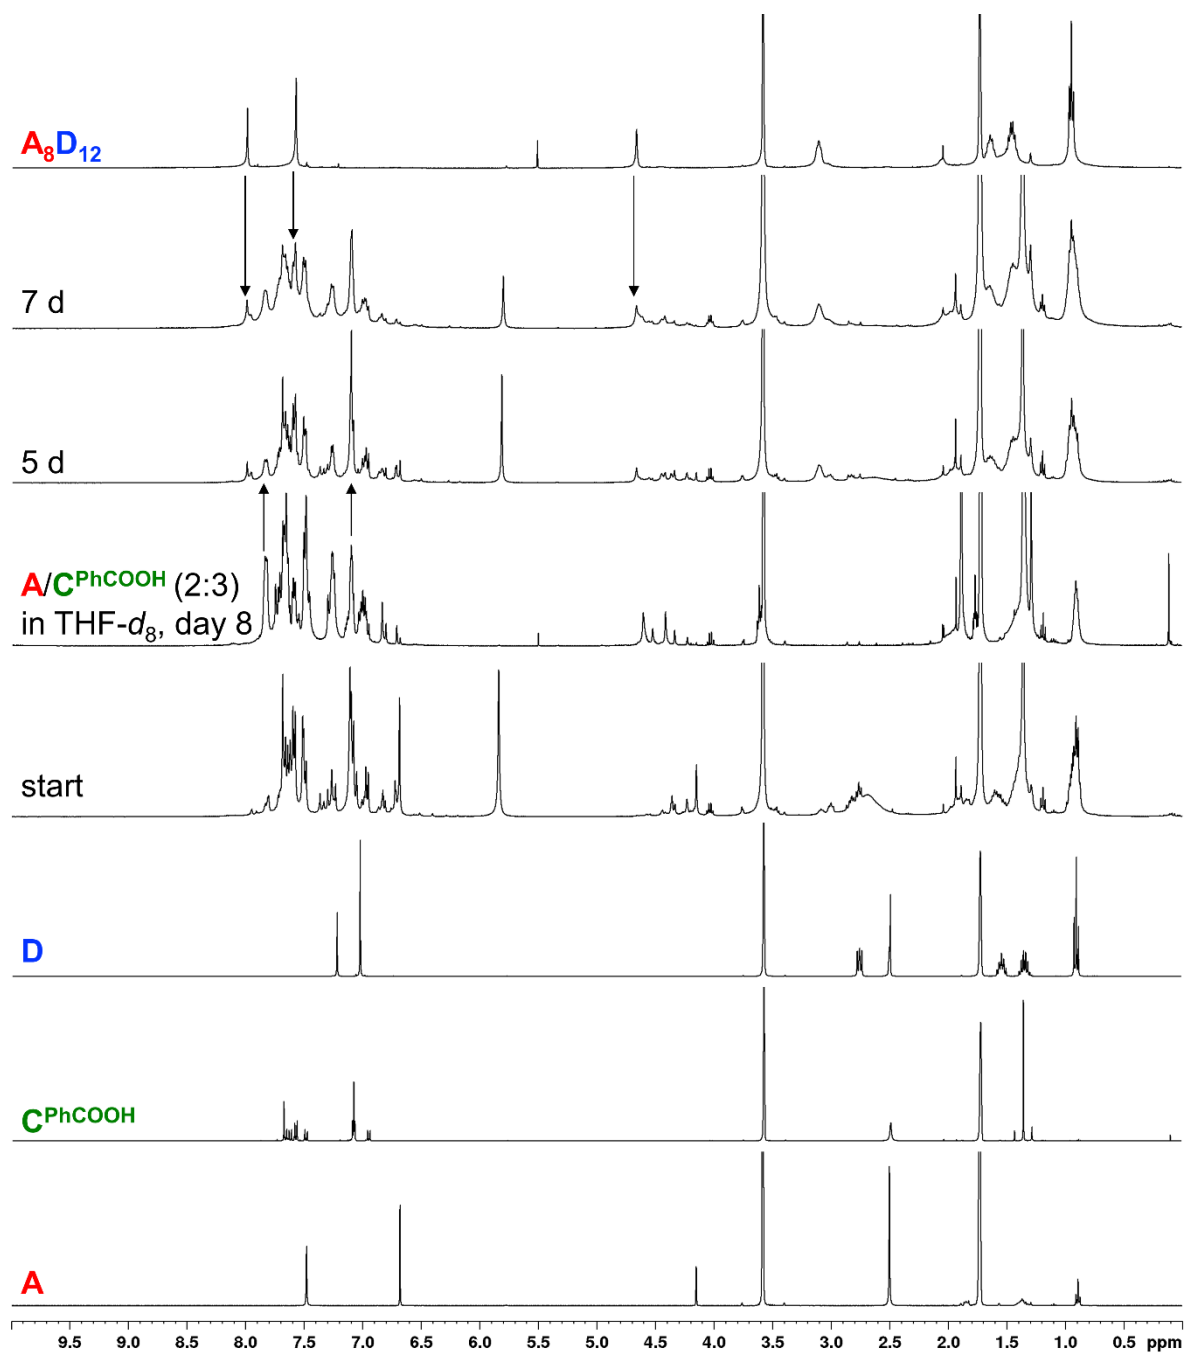

**Figure S19.** <sup>1</sup>H NMR (400 MHz, THF-*d*<sub>8</sub>, rt) spectra for the self-sorting experiment between A/C<sup>Ph</sup>COOH/D = 4:4:2 ( $c(\text{A}) = 2.0 \times 10^{-2} \text{ mol L}^{-1}$ ) at the beginning of the reaction, after five days and after seven days in comparison to the cubic cage A<sub>8</sub>D<sub>12</sub> and the reaction mixture of A<sub>2</sub>C<sup>Ph</sup>COOH<sub>3</sub> after eight days as well as the starting materials A, C<sup>Ph</sup>COOH and D.



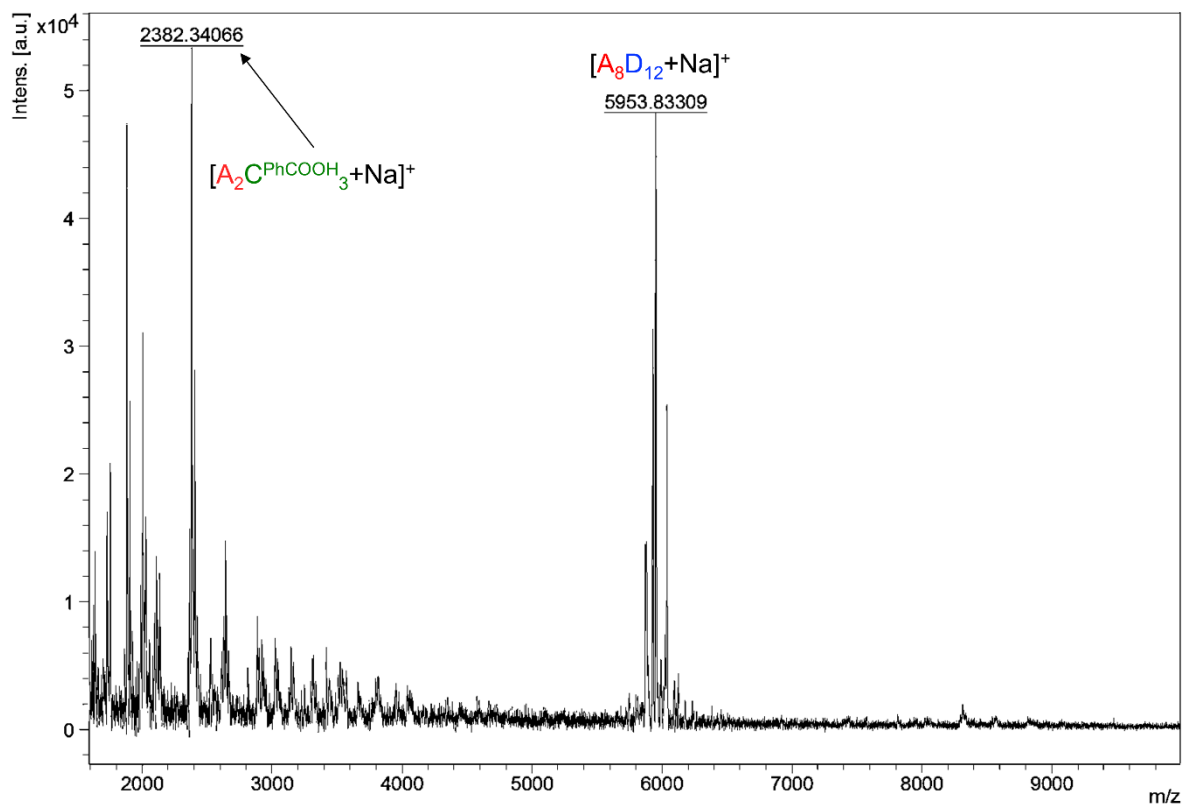

**Figure S20.** MS (MALDI-TOF, DCTB in  $\text{CHCl}_3$ , pos.) of the reaction mixture for the self-sorting experiment  $\text{A/C}^{\text{PhCOOH}}/\text{D} = 4:4:2$  ( $c(\text{A}) = 2.0 \times 10^{-2} \text{ mol L}^{-1}$ ).

## 4 Molecular Modeling

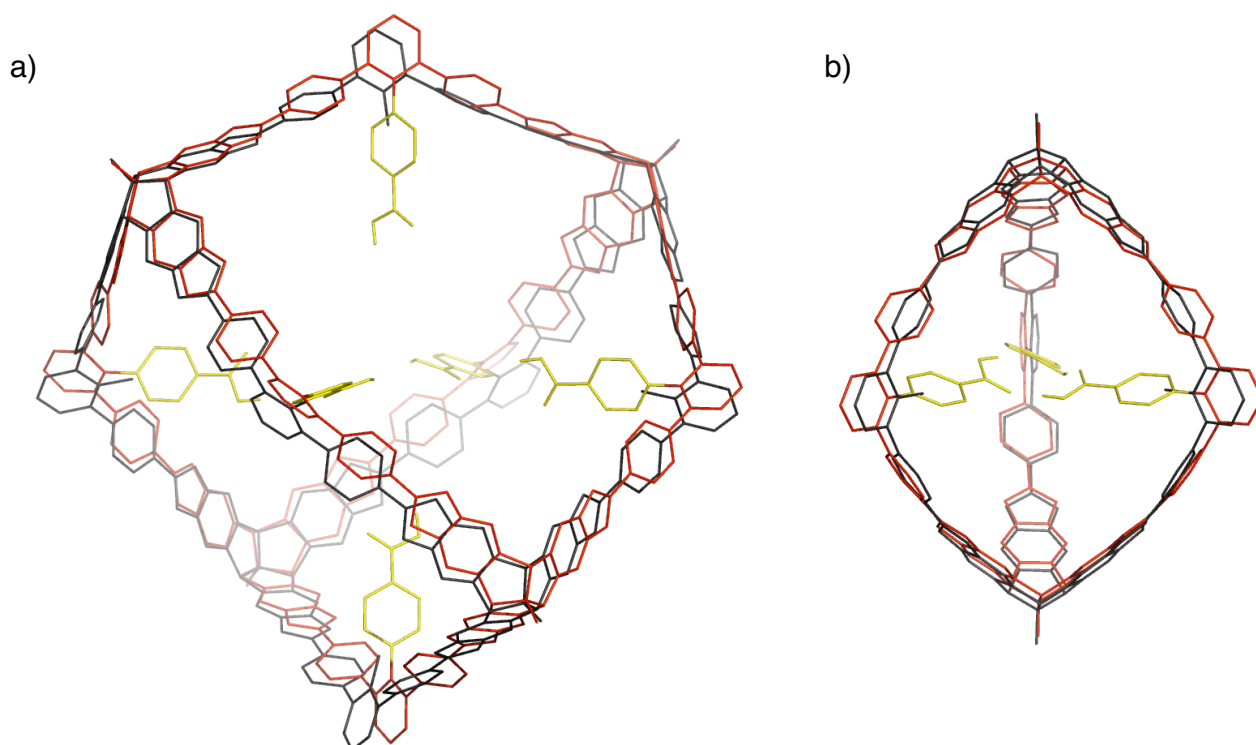

**Figure S21.** Overlay of DFT-geometry optimized molecular structures for a) tetrahedral cages  $A_4C^{Me}_6$  (black) and  $A_4C^{PhCOOH}_6$  (red, PhCOOH substituents in yellow) and b) trigonal-bipyramidal cages  $A_2C^{Me}_3$  (black) and  $A_2C^{PhCOOH}_6$  (red, PhCOOH substituents in yellow); to reduce computational time and resources,  $n$ Bu groups at the apical position of A have been replaced with Me groups and  $t$ BuPh substituents in 5'-position of  $C^{PhCOOH}$  have been replaced with H atoms; for the images, H atoms are omitted for clarity.

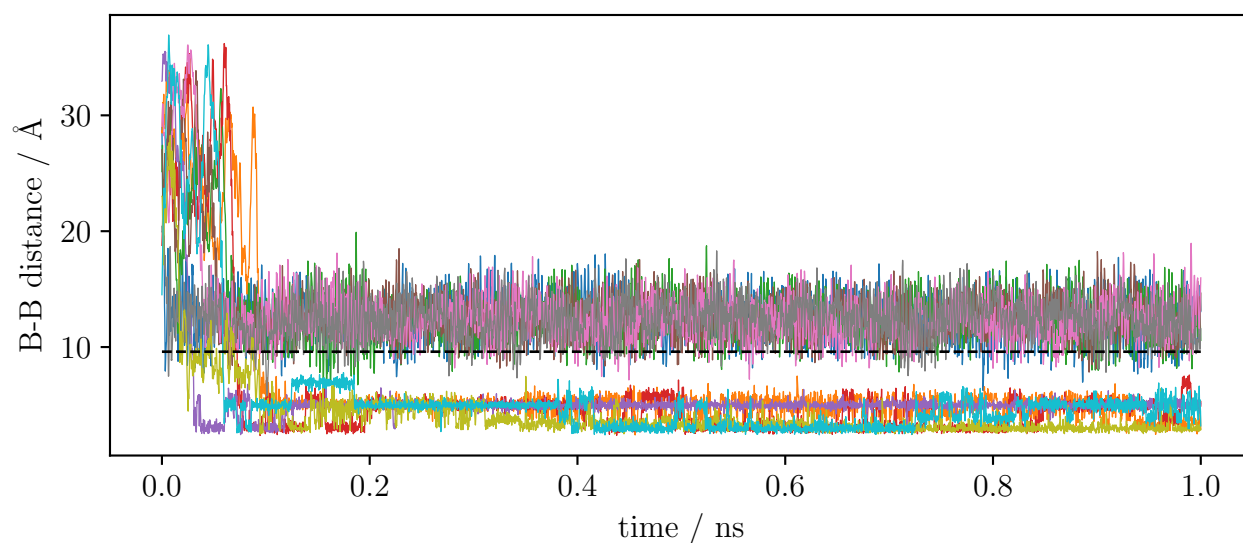

**Figure S22.** Ten MD trajectories for  $AC^{PhCOOH}_2$  with different starting conformations at 298 K for 1 ns (the dashed black line marks the B-B distance in the  $A_2C^{PhCOOH}_2$  macrocycles).

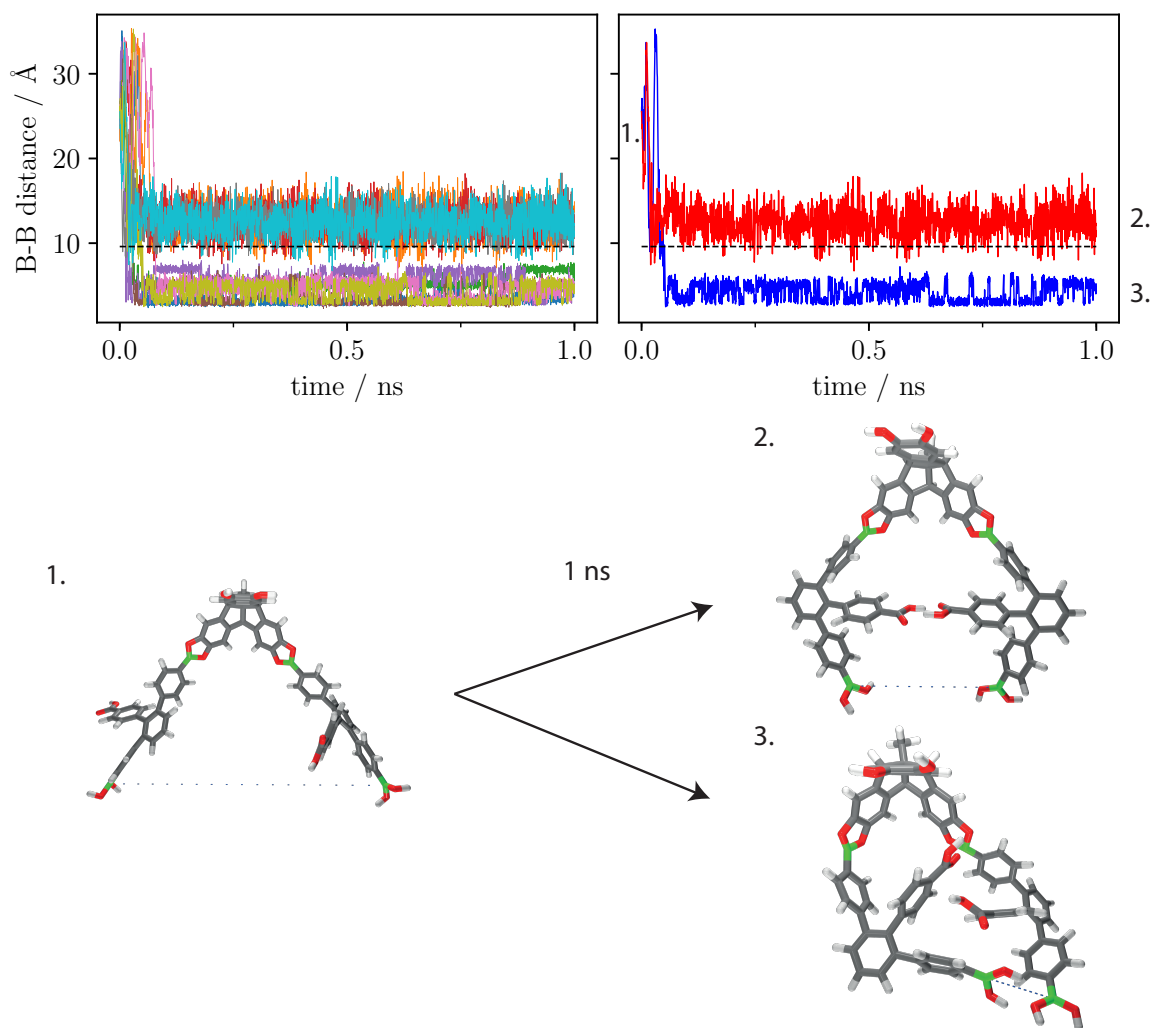

**Figure S23.** Right: MD trajectories for one starting conformation of  $\text{AC}^{\text{PhCOOH}}_2$  (1.) with ten randomly generated initial velocities at 298 K for 1 ns (the dashed black line marks the B-B distance in the  $\text{A}_2\text{C}^{\text{PhCOOH}}_2$  macrocycles); left: Two selected trajectories leading to fixed U-shaped conformer (2., red trace) or a more compact metastable conformer (3., blue trace)

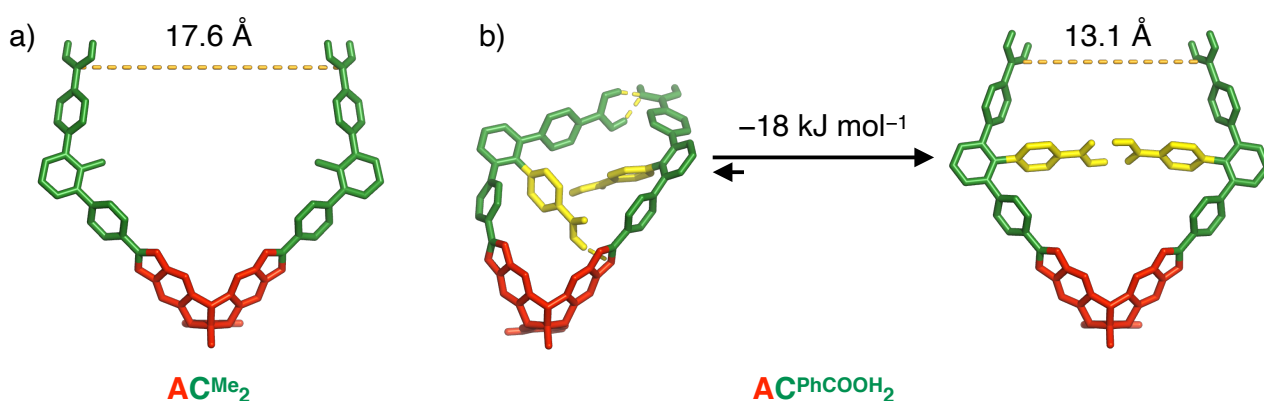

**Figure S24.** DFT-geometry optimized molecular structures for a)  $\text{AC}^{\text{Me}}_2$  and b) the two fixed conformers for  $\text{AC}^{\text{PhCOOH}}_2$  obtained from MD simulations.

## 5 References

- [S1] R. Breslow, P. Marks, A. Mahendran, Y. Yao (Columbia University), US20180118709, **2018**.
- [S2] S. Klyatskaya, N. Dingenouts, C. Rosenauer, B. Müller, S. Höger, *J. Am. Chem. Soc.* **2006**, *128*, 3150–3151.
- [S3] A. B. Vliegthart, F. A. L. Welling, M. Roemelt, R. J. M. Klein Gebbink, M. Otte, *Org. Lett.* **2015**, *17*, 4172–4175.
- [S4] S. Klotzbach, T. Scherpf, F. Beuerle, *Chem. Commun.* **2014**, *50*, 12454–12457.
